# Supplementary material for: Coaxial spinning of Ti 3 C 2 T X MXene fibers with spontaneous radial densification achieves simultaneous improvements in both mechanical strength and charge storage ability
Source: Royal Society of Chemistry journal article supplement (doi:10.1039/d5nr04025f), 2026-01-01
Supplement: d5nr04025f1.pdf [file d5nr04025f1.pdf]

# Coaxial Spinning $\text{Ti}_3\text{C}_2\text{T}_x$ MXene Fibers with Spontaneous Radial Densification Achieves Simultaneous Improvements in Both Mechanical Strength and Charge Storage Ability

Fanjie Shi,<sup>†</sup> Henghan Dai,<sup>†</sup> Ning He, Yang Guo, Yufan Shen, Huifang Wang, Hai Xu,\*

Yuzhen Wang,\* Gengzhi Sun\*

Institute of Advanced Materials (IAM), Nanjing Tech University (NanjingTech), 30  
South Puzhu Road, Nanjing 211816, China

E-mail: iamxuhai@njtech.edu.cn (H. Xu); iamyzwang@njtech.edu.cn (Y. Z. Wang);

iamgzsun@njtech.edu.cn (G. Z. Sun)

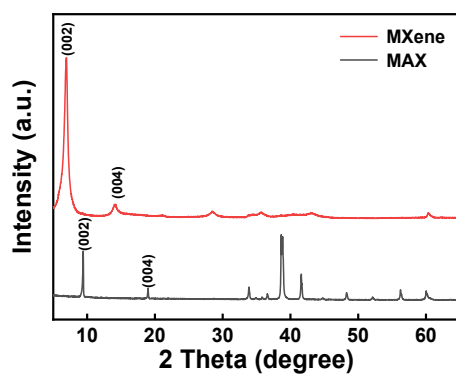

**Fig. S1** XRD patterns of precursor  $\text{Ti}_3\text{AlC}_2$  MAX and  $\text{Ti}_3\text{C}_2\text{T}_x$  MXene nanosheets.

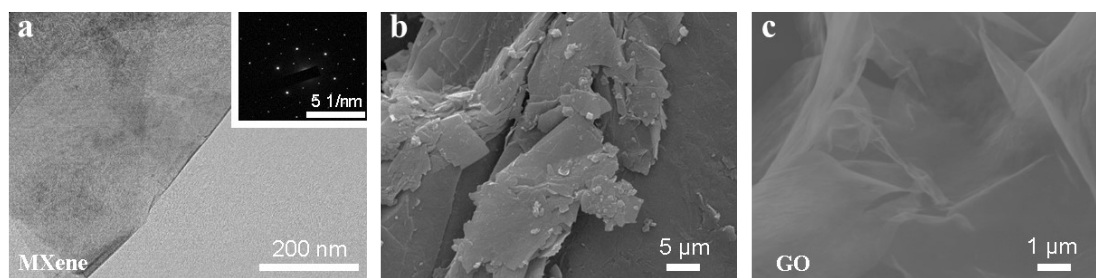

**Fig. S2** (a) TEM image of MXene nanosheets (The inset illustration shows the selected area electron diffraction (SAED) pattern. (b) SEM image of Graphite before exfoliation. (c) SEM image of GO nanosheets.

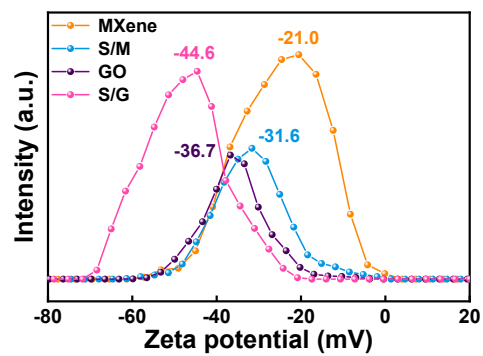

**Fig. S3** Zeta potentials of MXene, SA/MXene (S/M), GO and SA/GO (S/G).

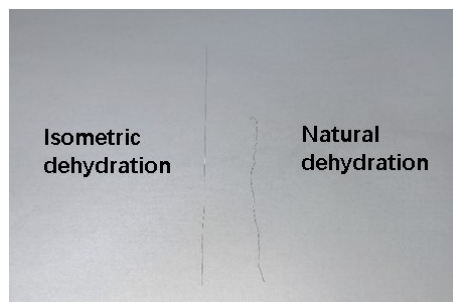

**Fig. S4** Photographs of S/M@S/G fibers that are forced to maintain its original length and dried without any restriction during desiccation.

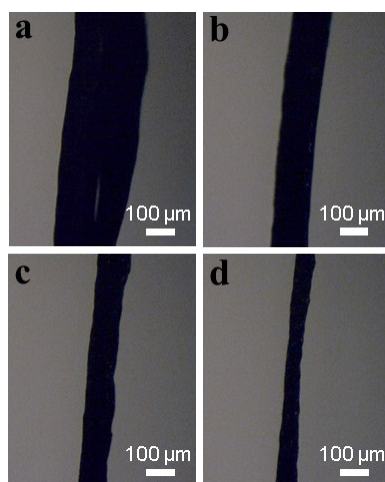

**Fig. S5** Photographs of S/M@S/G fiber at different drying time: (a) 2 min (198  $\mu\text{m}$  in diameter), (b) 4 min, (c) 6 min and (d) 8 min (56  $\mu\text{m}$  in diameter).

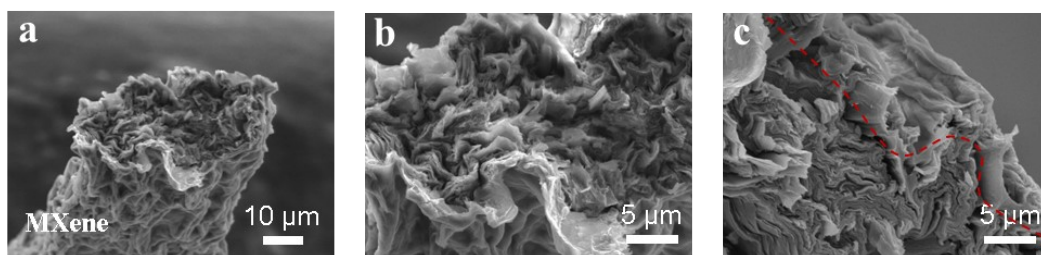

**Fig. S6** Cross sectional SEM image of (a) MXene fiber. High-magnification SEM image of (b) MXene fiber and (c) S/M@S/G fiber (The red dotted line is the core and shell boundary line).

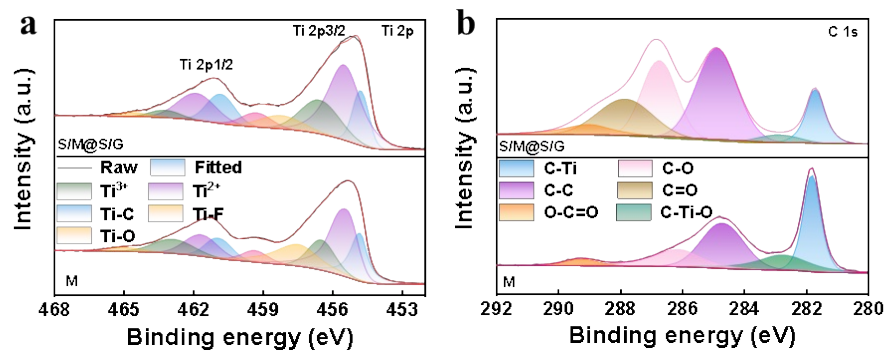

**Fig. S7** (a) Ti 2p XPS spectra and (b) C 1s XPS spectra of MXene and S/M@S/G fibers.



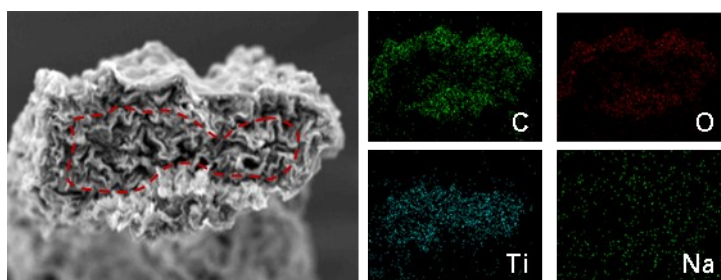

**Fig. S8** EDS mapping of S/M@S/G hybrid core-sheath fiber (The red dotted line is the core and shell boundary line).

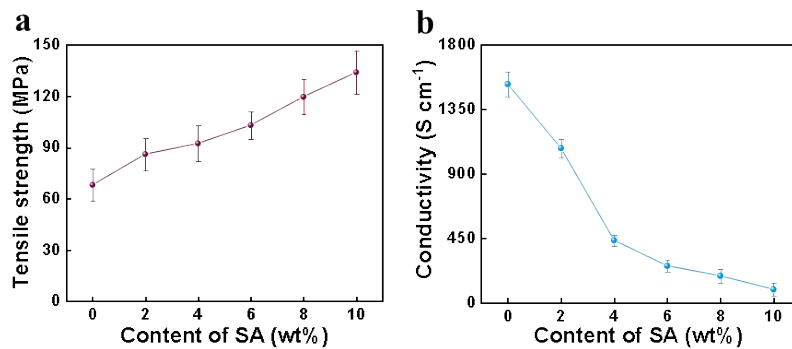

**Fig. S9** (a) Tensile strength and (b) Conductivity of S/M fiber with different SA contents.

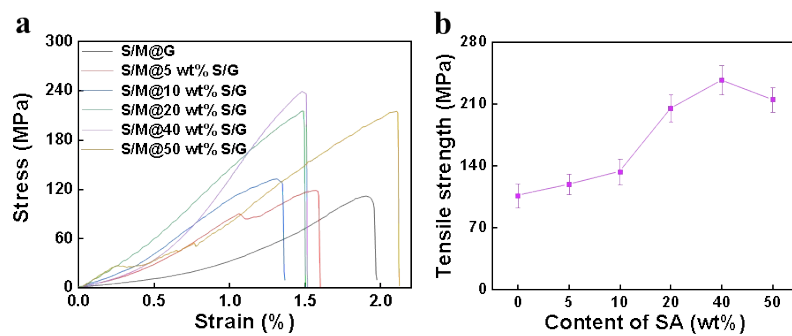

**Fig. S10** (a) Stress-strain curves and (b) tensile strength of S/M@S/G fiber with different SA contents in shell.

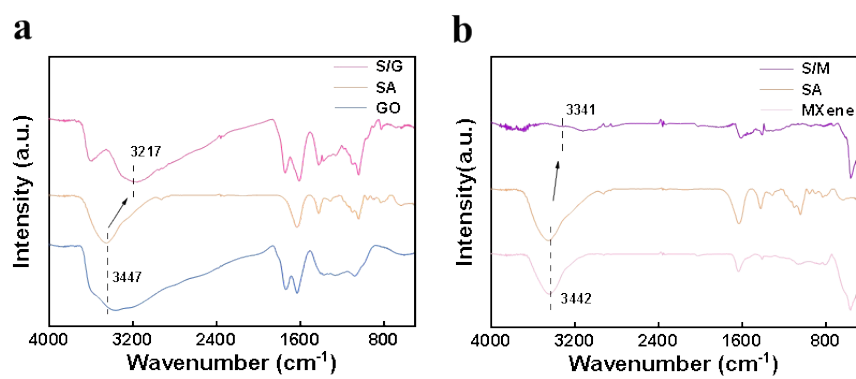

**Fig. S11** (a) FT-IR spectra of GO, SA and S/G. (b) FTIR spectra of MXene, SA and S/M.

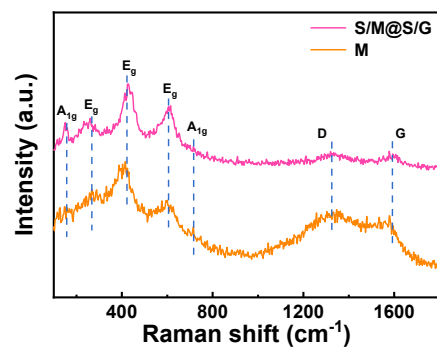

**Fig. S12** Raman spectra of pure MXene fiber and S/M@S/G core-sheath fiber.

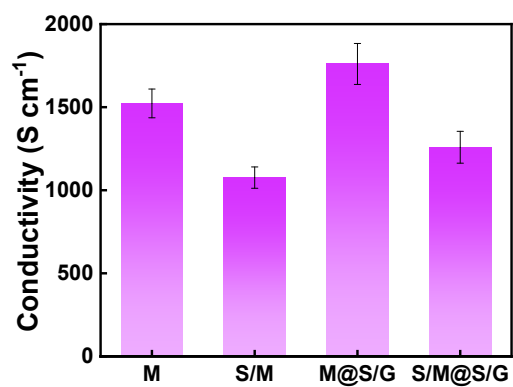

**Fig. S13** The conductivity of pure MXene, S/M, M@S/G and S/M@S/G fibers.

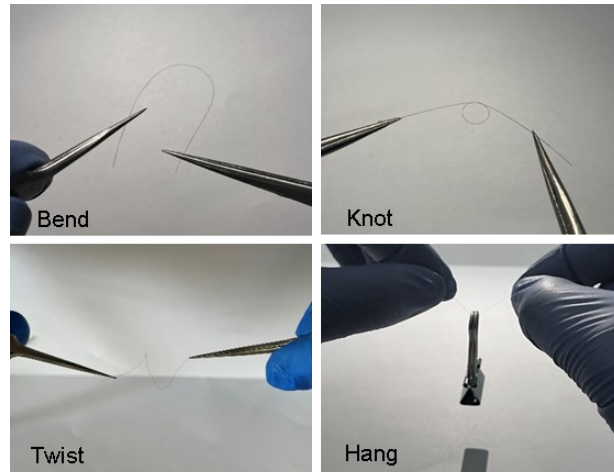

**Fig. S14** The mechanical properties of S/M@S/G core-sheath fiber under different conditions.

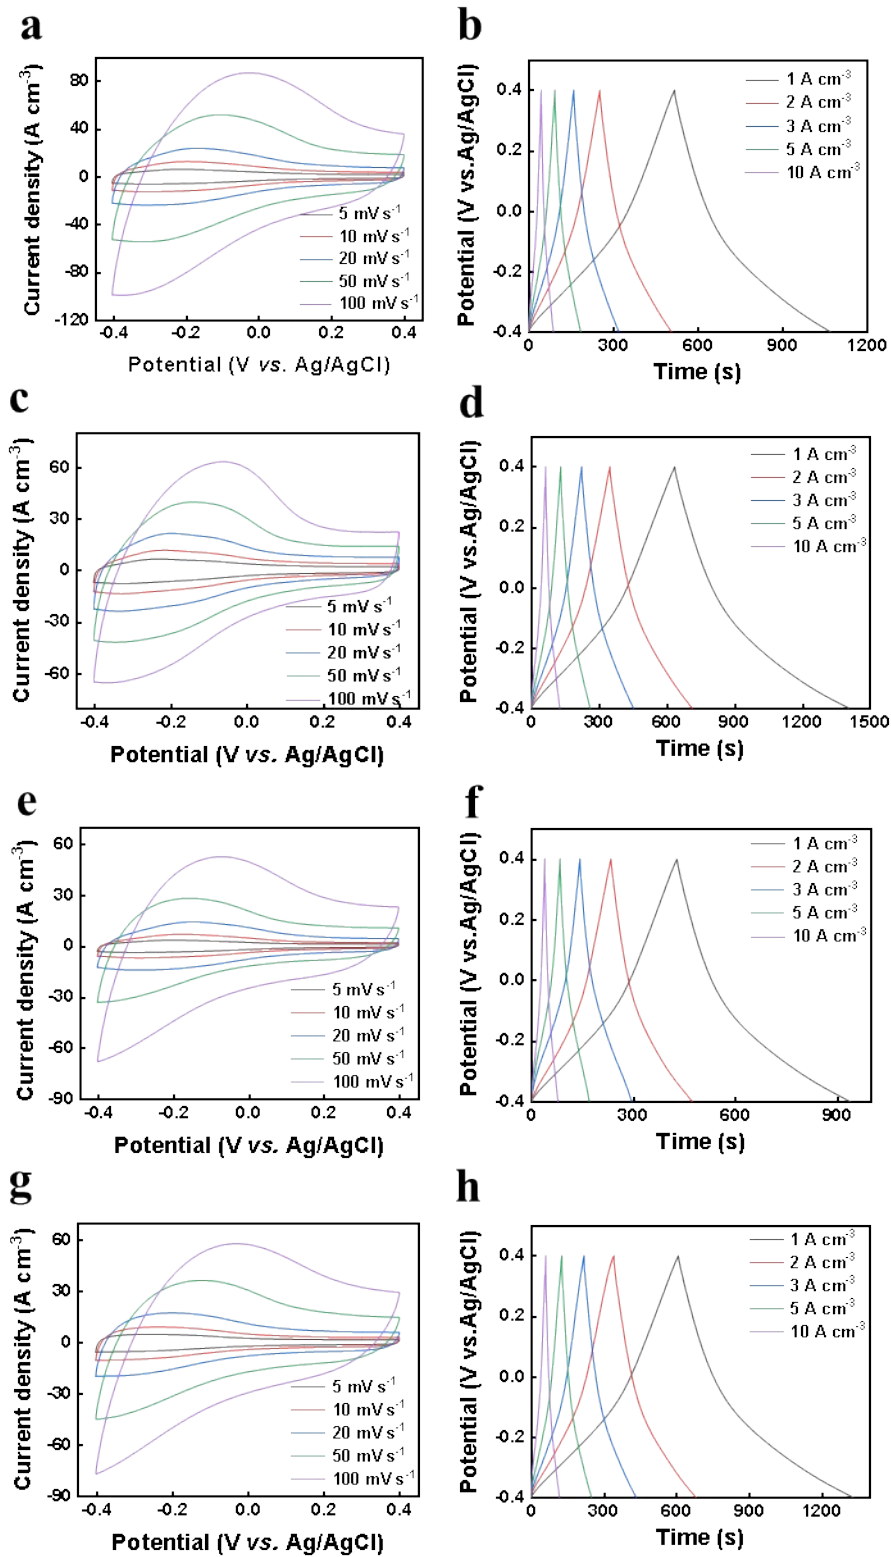

**Fig. S15** The CV curves at different scan rates and GCD profiles at different current densities of (a, b) MXene fiber, (c, d) S/M fiber, (e, f) M@S/G fiber and (g, h) S/M@S/G fiber.



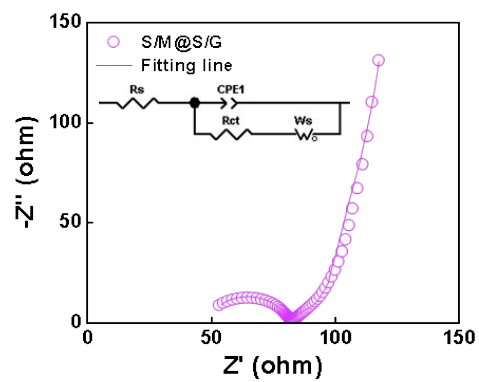

**Fig. S16** Nyquist plots of S/M@S/G fiber in two-electrode system.

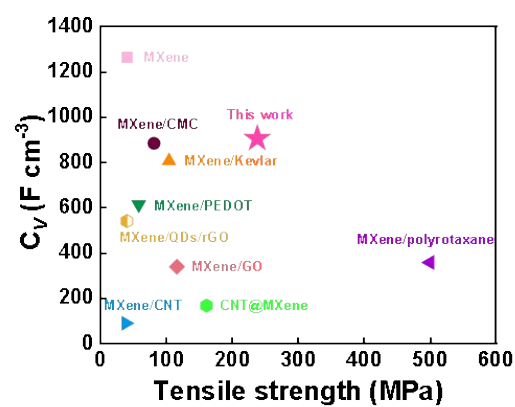

**Fig. S17** Comparison of S/M@S/G core-sheath fiber with several previously reported MXene-based fibers regarding tensile strength and volumetric capacitance.

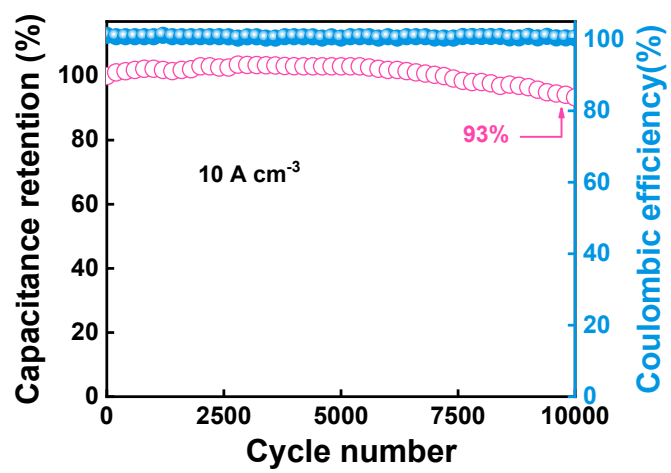

**Fig. S18** Stability of S/M@S/G fiber over 10000 cycles at 10 A cm<sup>-3</sup>.

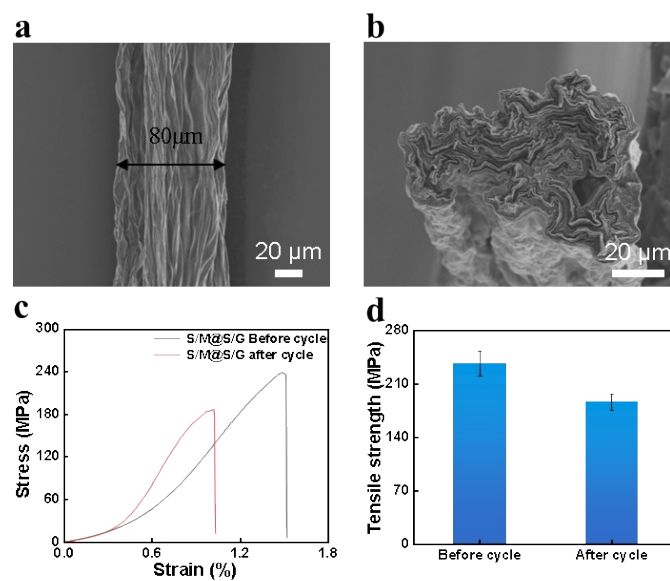

**Fig. S19** (a) SEM image and (b) cross section SEM image of S/M@S/G core-sheath fiber (after 10000 charge-discharge cycles). (c) Strain-Stress curves and (d) The Tensile strength of S/M@S/G fiber before and after 10000 cycles.

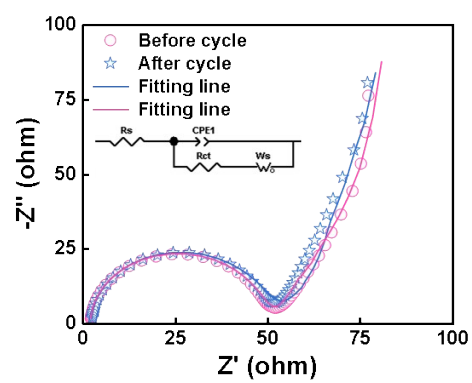

**Fig. S20** Nyquist plots of S/M@S/G fiber after 10000 cycles of charge and discharge.

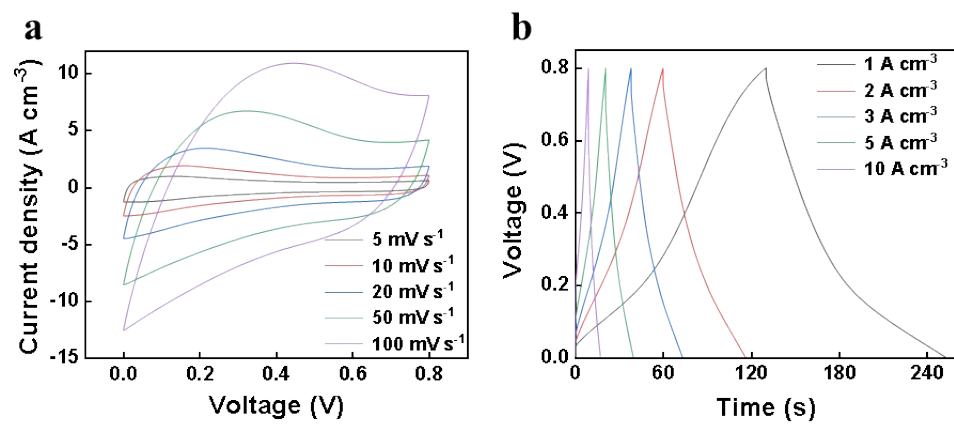

**Fig. S21** (a) CV and (b) GCD profiles of FSC based on S/M@S/G fibers.

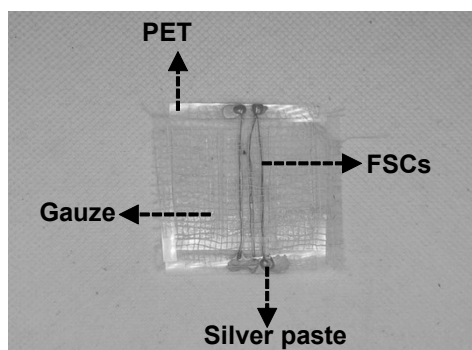

**Fig. S22** Photograph of device with several FSCs connected in series (two similar fibers were loaded into the heat shrink tube and gel electrolyte was dropped into the device. The three devices were woven in a piece of gauze. The FSC device was capsulated on a PET substrate).

**Table S1:** Detailed information and performance comparison of the MXene-based fiber cited in Fig. 3(d and e).

| Material                                                       | Preparation technique | Tensile strength (MPa) | Toughness (MJ m <sup>-3</sup> ) | Conductivity (S cm <sup>-1</sup> ) | Ref.      |
|----------------------------------------------------------------|-----------------------|------------------------|---------------------------------|------------------------------------|-----------|
| Ti <sub>3</sub> C <sub>2</sub> T <sub>x</sub> /CNT             | Biscrolling           | 26.6                   | 2.01                            | 26                                 | 36        |
| Ti <sub>3</sub> C <sub>2</sub> T <sub>x</sub> /rGO             | Wet spinning          | 110.7                  | 3.8                             | 743.1                              | 32        |
| MXene/GO                                                       | Wet spinning          | 116.1                  | 0.94                            | 72.3                               | 34        |
| Ti <sub>3</sub> C <sub>2</sub> T <sub>x</sub> -1               | Wet spinning          | 63.9                   | 0.09                            | 7713                               | 10        |
| Ti <sub>3</sub> C <sub>2</sub> T <sub>x</sub> -2               | Wet spinning          | 118                    | 1.09                            | 7200                               | 33        |
| MKB                                                            | Wet spinning          | 242.6                  | 1.0                             | 1412                               | 31        |
| Ti <sub>3</sub> C <sub>2</sub> T <sub>x</sub> -nanoyarns       | Electrospinning       | 40                     | 0.27                            | 1195                               | 40        |
| Ti <sub>3</sub> C <sub>2</sub> T <sub>x</sub> -PEDOT:PSS       | Wet spinning          | 58.1                   | 0.32                            | 1489                               | 37        |
| Ti <sub>3</sub> C <sub>2</sub> T <sub>x</sub> /Cellulose Yarns | Coating               | 468.4                  |                                 | 440                                | 39        |
| S/M@S/G                                                        | Wet spinning          | 238                    | 1.44                            | 1232                               | This work |



**Table S2.** Detailed information and performance comparison of the MXene-based fiber electrodes cited in Fig. 4(i).

| Materials              | Testing configuration                              | $C_v$<br>(F cm <sup>-3</sup> ) | Potential<br>range (V) | Scan rate<br>or<br>current<br>density | Ref.         |
|------------------------|----------------------------------------------------|--------------------------------|------------------------|---------------------------------------|--------------|
| MXene                  | three-electrode system<br>platinum mesh<br>Ag/AgCl | 759.0                          | -0.4~0.2               | 0.5 A g <sup>-1</sup>                 | 55           |
| MXene                  | three-electrode system<br>carbon rod<br>Ag/AgCl    | 1265                           | -0.8~0.2               | 10 mV s <sup>-1</sup>                 | 50           |
| MXene/CMC              | three-electrode system<br>carbon rod<br>Ag/AgCl    | 885                            | -0.6~0.2               | 1 A cm <sup>-3</sup>                  | 15           |
| MXene/Kevlar           | three-electrode system                             | 807                            | -0.6~0.2               | 3 A cm <sup>-3</sup>                  | 52           |
| MXene/PEDOT            | three-electrode system<br>platinum mesh<br>Ag/AgCl | 614.5                          | -0.8~0.2               | 5 mV s <sup>-1</sup>                  | 38           |
| MXene/QDs/rGO          | three-electrode system                             | 542                            | -0.2~0.8               | 0.25 A<br>cm <sup>-3</sup>            | 51           |
| MXene/rGO              | three-electrode system                             | 415                            | -0.2~0.4               | 1 A cm <sup>-3</sup>                  | 53           |
| MXene/CNT              | three-electrode system<br>platinum mesh<br>Ag/AgCl | 92                             | -0.9~0                 | 1 A cm <sup>-3</sup>                  | 9            |
| MXene/<br>Polyrotaxane | three-electrode system                             | 360                            | 0~1.0                  | 5 mV s <sup>-1</sup>                  | 49           |
| S/M@S/G                | three-electrode system<br>carbon rod<br>Ag/AgCl    | 906                            | -0.4~0.4               | 1 A cm <sup>-3</sup>                  | This<br>work |
